# Supplementary material for: Au–Pt alloy nanoparticles site-selectively deposited on CaIn2S4nanosteps as efficient photocatalysts for hydrogen production
Source: Royal Society of Chemistry journal article supplement (doi:10.1039/c6ta04468a), 2016-01-01
Supplement: c6ta04468a1.pdf [file c6ta04468a1.pdf]

## Electronic Supplementary Information

### Au-Pt alloy nanoparticles site-selectively deposited on $\text{CaIn}_2\text{S}_4$ nanosteps as efficient photocatalysts for hydrogen production

Jianjun Ding,<sup>a\*</sup> Xiangyang Li,<sup>a</sup> Lin Chen,<sup>a</sup> Xian Zhang,<sup>a</sup> Song Sun,<sup>b\*</sup> Jun Bao,<sup>b</sup> Chen Gao<sup>b</sup> and Xingyou Tian<sup>a</sup>

<sup>a</sup> Institute of Applied Technology, Hefei Institutes of Physical Science, Chinese Academy of Sciences, Hefei 230088, China.

<sup>b</sup> National Synchrotron Radiation Laboratory, Collaborative Innovation Center of Chemistry for Energy Materials, University of Science and Technology of China, Hefei 230029, China.

\*Corresponding author:

Tel: (+86)551-65591418, E-mail: dingjj@rntek.cas.cn (J. D.);

Tel: (+86)551-63607492, E-mail: suns@ustc.edu.cn (S. S.).

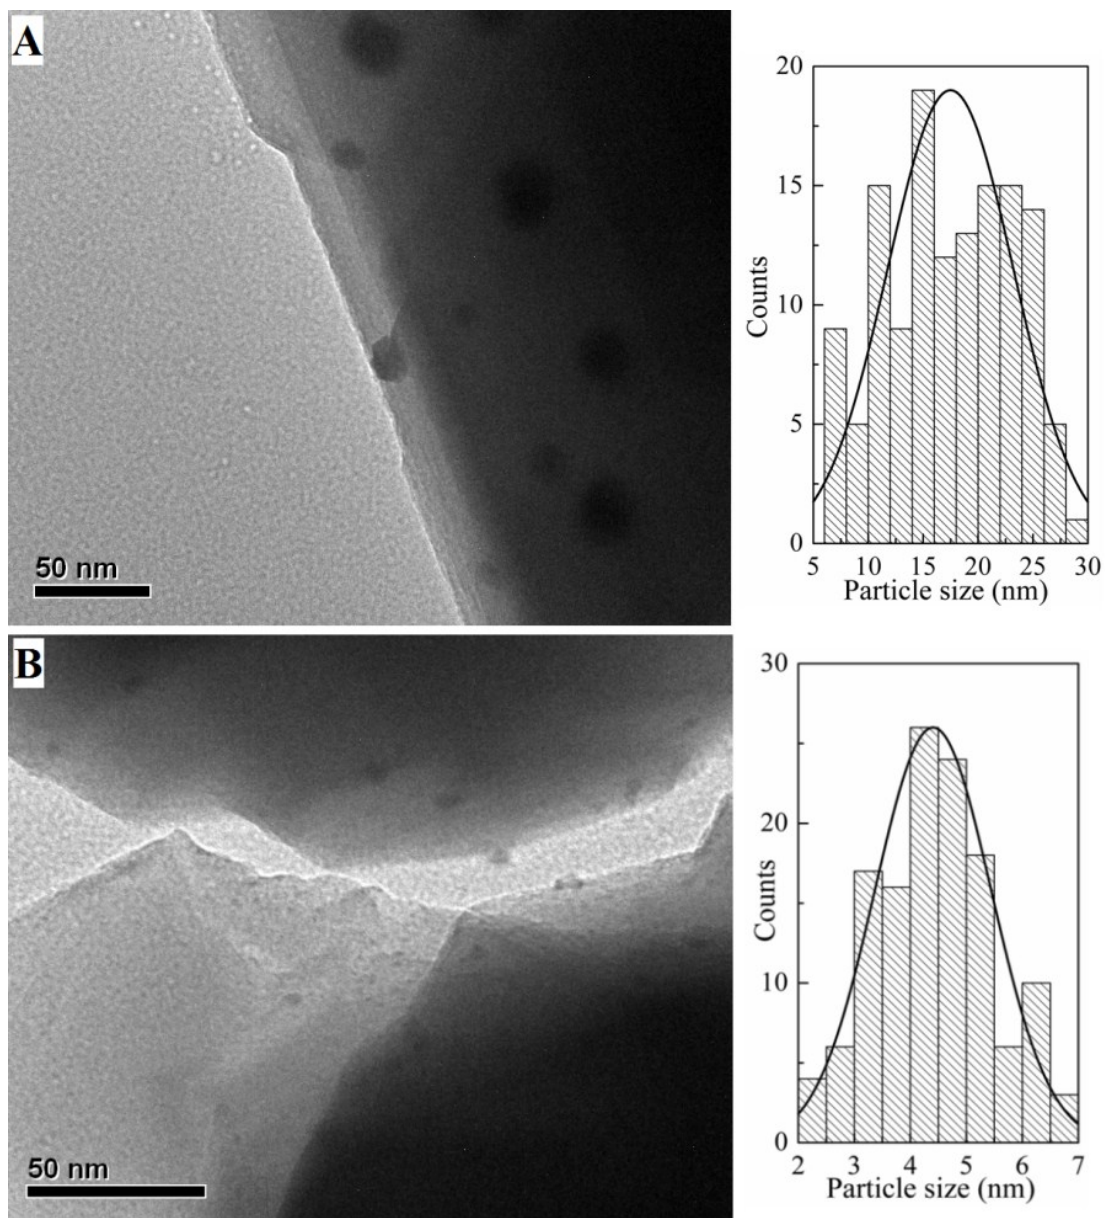

Figure S1. TEM image and size distribution of  $\text{Au}_{0.5}/\text{CIS}$  (A) and  $\text{Pt}_{0.5}/\text{CIS}$  (B) composite.

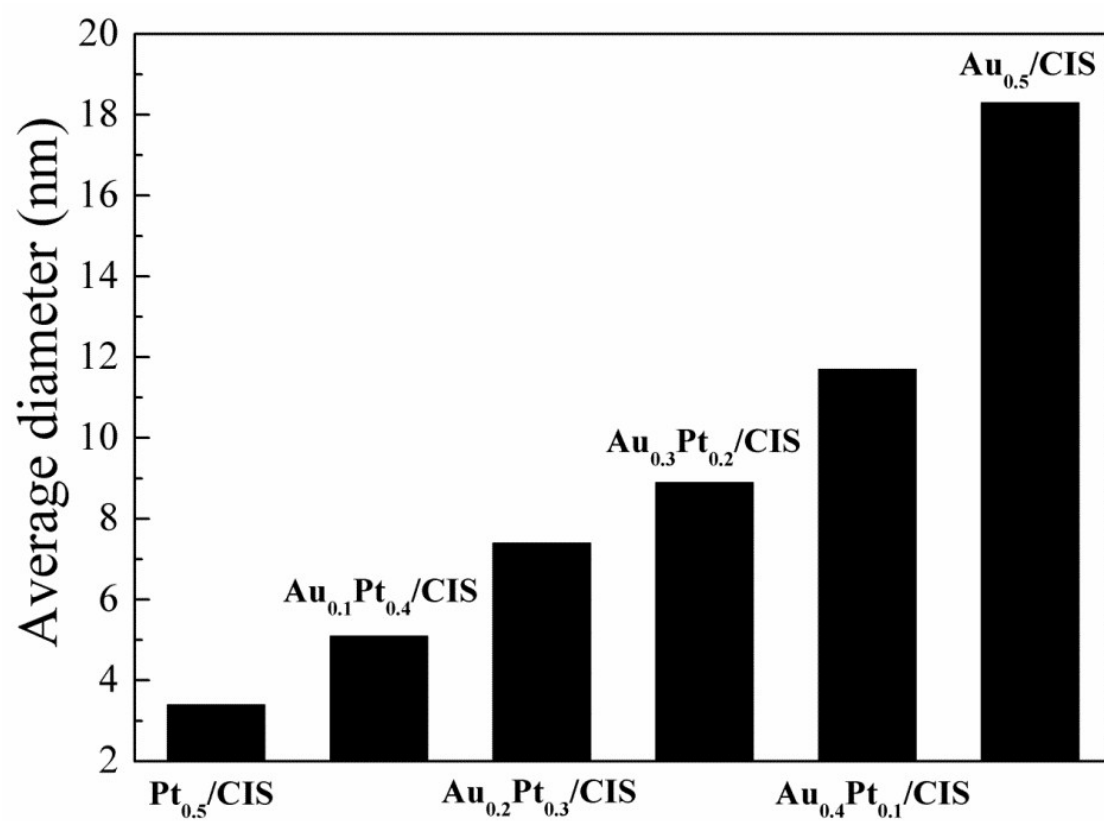

Figure S2. Size distribution of Au<sub>0.5-x</sub>Pt<sub>x</sub>/CIS composite with different content of Pt.

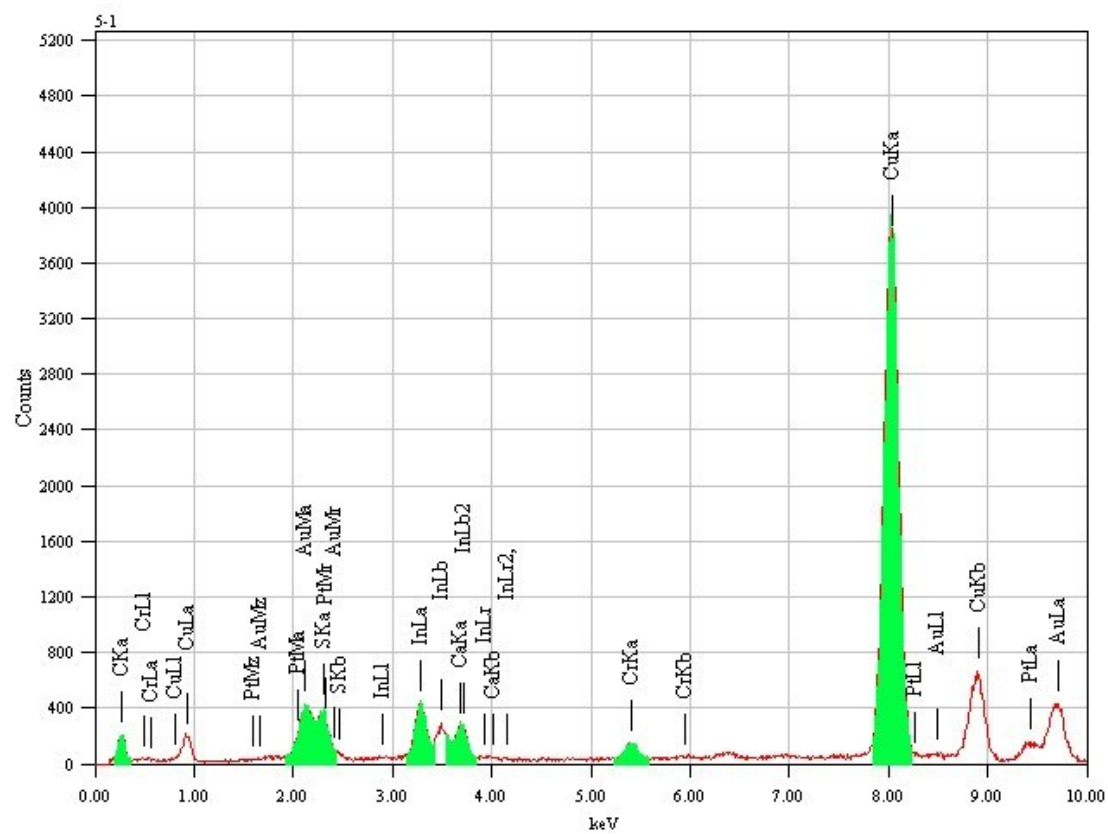

Figure S3. EDS spectra of  $\text{Au}_{0.3}\text{Pt}_{0.2}/\text{CIS}$  composite.

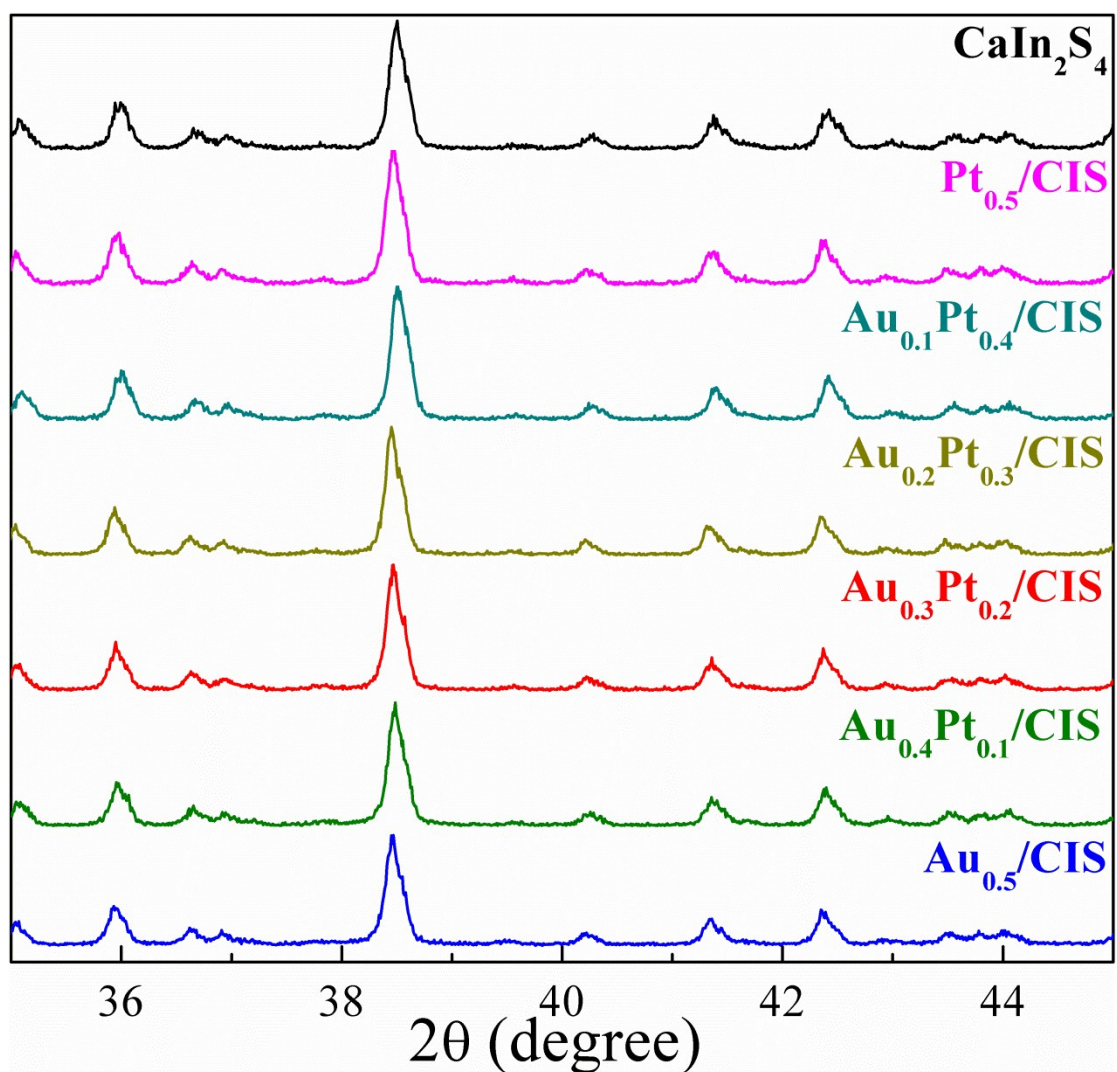

Figure S4. XRD patterns of  $\text{Au}_{0.5-x}\text{Pt}_x/\text{CIS}$  composite and  $\text{CaIn}_2\text{S}_4$  with enlarged magnification.

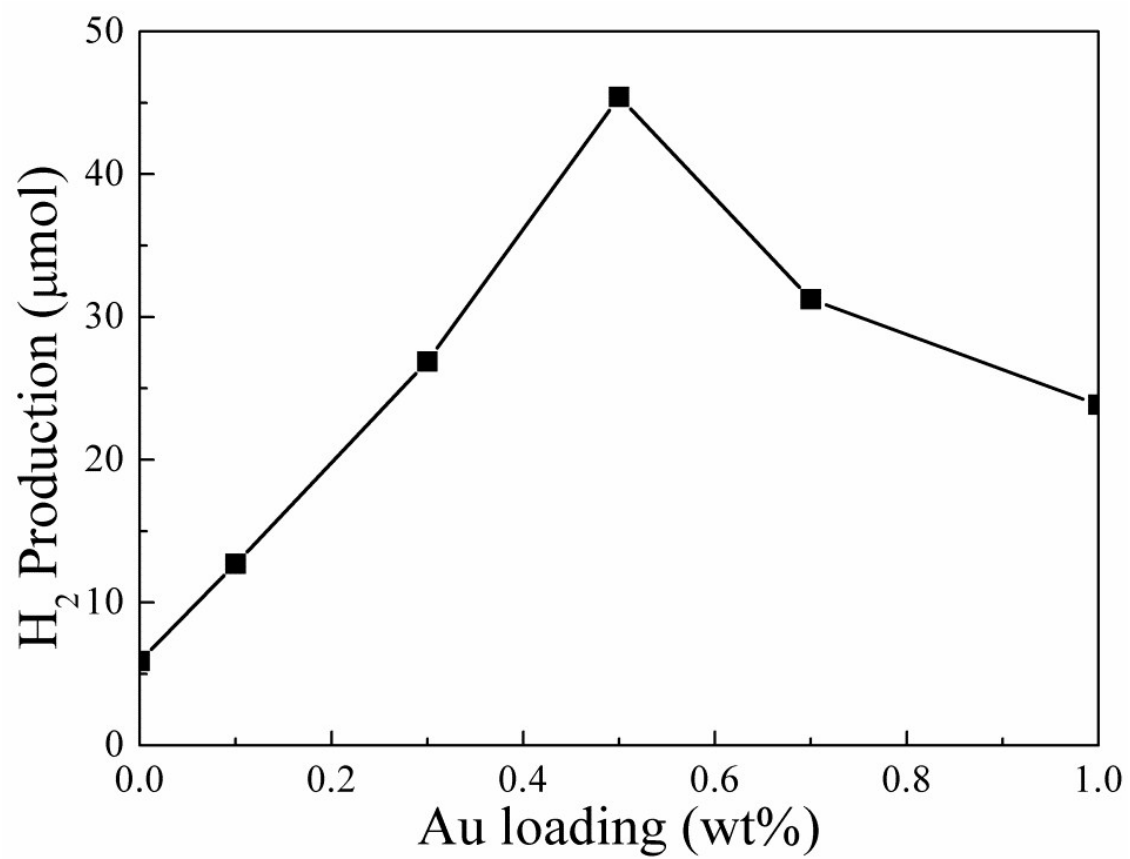

Figure S5. Photocatalytic activity of Au/CIS composites as a function of Au content.

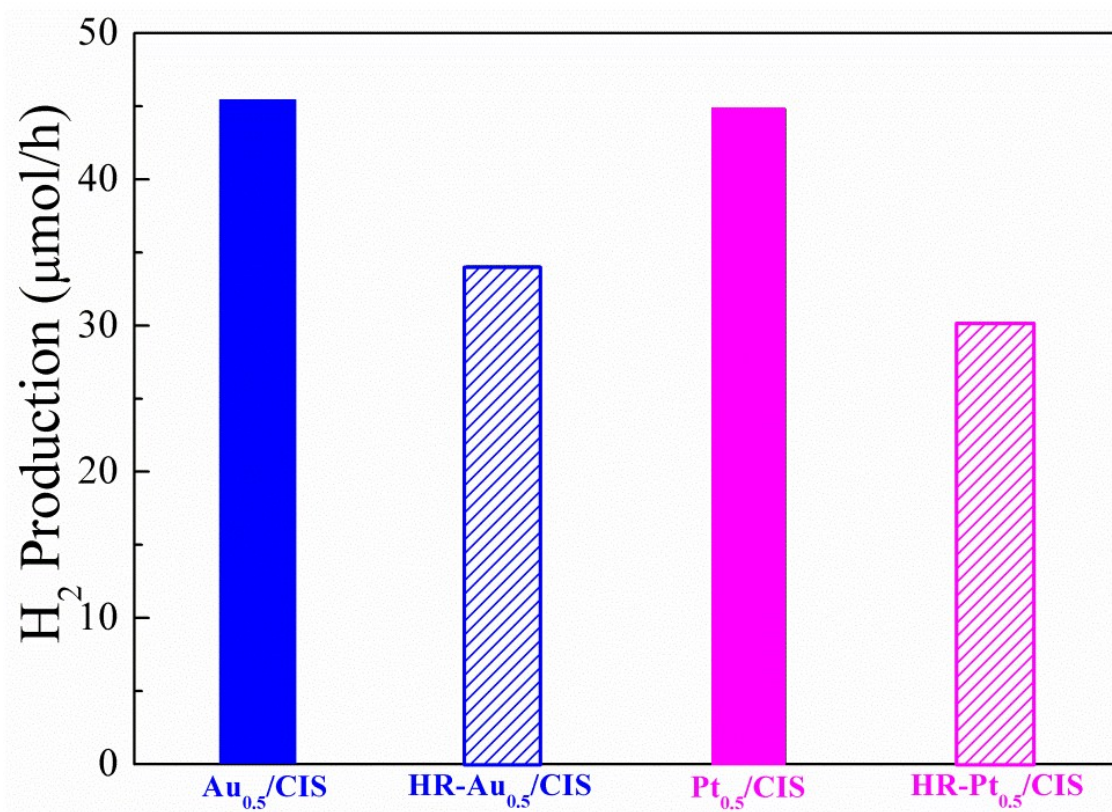

Figure S6. Hydrogen production rate of Au<sub>0.5</sub>/CIS, HR-Au<sub>0.5</sub>/CIS, Pt<sub>0.5</sub>/CIS and HR-Pt<sub>0.5</sub>/CIS under visible light irradiation.



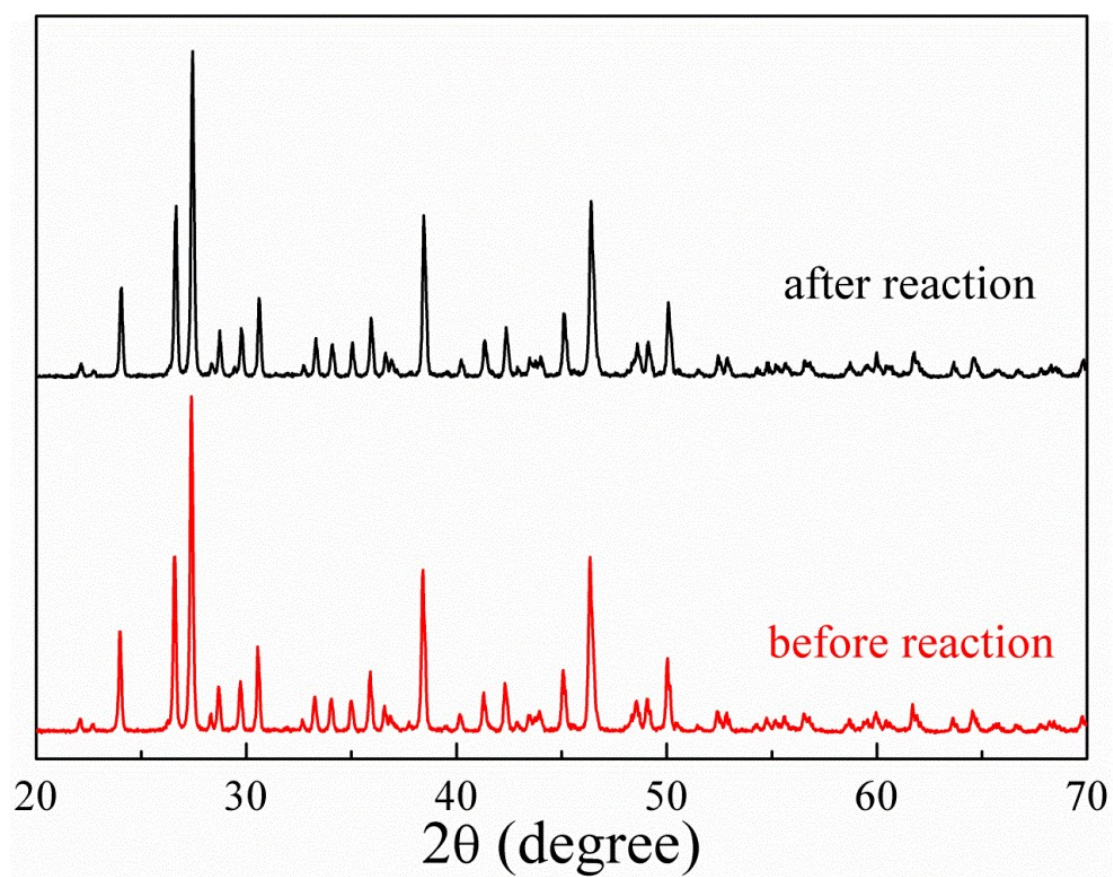

Figure S7. XRD patterns of  $\text{Au}_{0.3}\text{Pt}_{0.2}/\text{CIS}$  composite before and after the photocatalytic reaction.



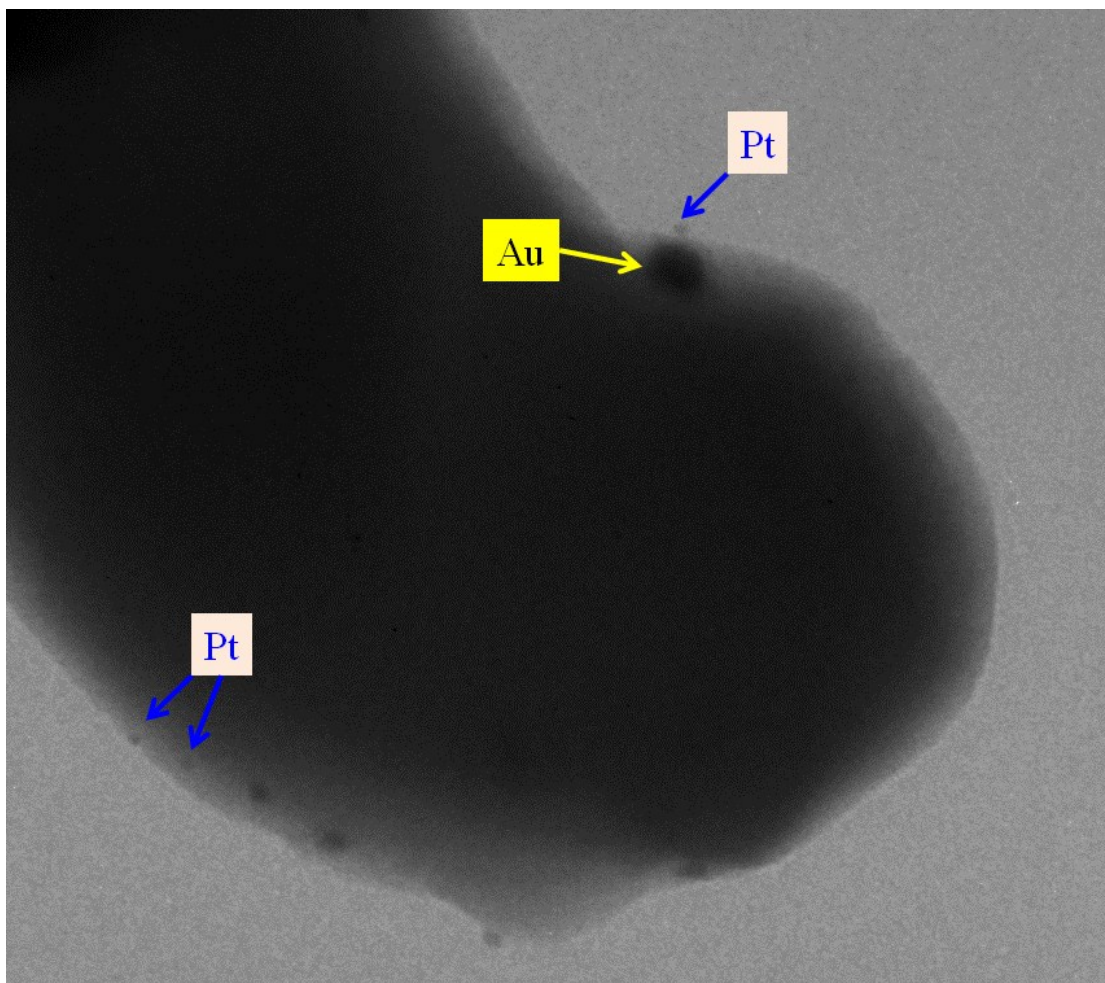

Figure S8. TEM image of photoreduced Pt on Au<sub>0.5</sub>/CIS composite
